# Supplementary material for: A simple, convenient method to synthesize cobalamins: synthesis of homocysteinylcobalamin, N-acetylcysteinylcobalamin, 2-N-acetylamino-2-carbomethoxyethanethiolatocobalamin, sulfitocobalamin and nitrocobalamin
Source: Royal Society of Chemistry journal article supplement (doi:10.1039/b610158e), 2006-01-01

## Supporting Information

### A Simple, Convenient Method to Synthesize Cobalamins: Synthesis of Homocysteinylcobalamin, N-Acetylcysteinylcobalamin, 2-N-acetylamino-2-carbomethoxyethanethiolatocobalamin, Sulfitocobalamin and Nitrocobalamin

Edward Suarez-Moreira, Luciana Hannibal, Clyde A. Smith, Roberto A. Chavez, Donald W. Jacobsen and Nicola E. Brasch.

#### Figure S1

$^1\text{H}$  NMR spectrum of sulfitocobalamin in  $\text{D}_2\text{O}$ , pD 5.9 (0.1 M MES buffer),  $23 \pm 1$  °C. Five major signals are observed at 6.17, 6.94, 6.43, 6.25, and 6.03 ppm, in agreement with literature values.<sup>64</sup>

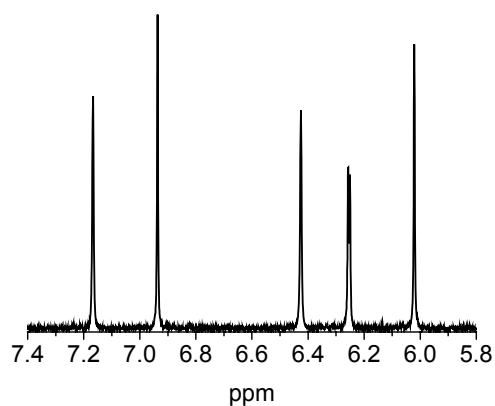

#### Figure S2

$^1\text{H}$  NMR spectrum of nitrocobalamin in  $\text{D}_2\text{O}$ , pD 5.9 (0.1 M MES buffer),  $23 \pm 1$  °C. Five major signals are observed at 6.20, 6.74, 6.42, 6.28, and 6.21 ppm, in agreement with literature values.<sup>70</sup>

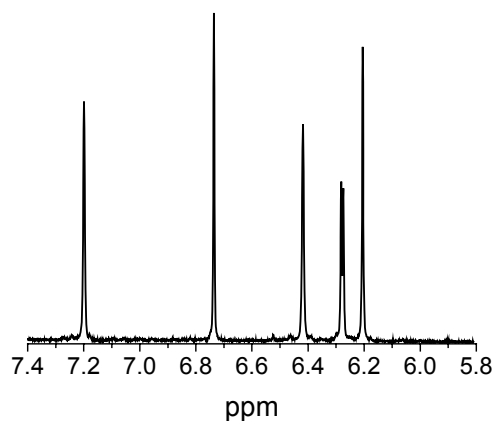

Supplement: b610158e.pdf [file b610158e.pdf]
